# Supplementary material
Source: PubMed Central journal article supplement (PMC3091222)
Supplement: supp_M110.209254_jbc.M110.209254-1.pdf [file supp_M110.209254_jbc.M110.209254-1.pdf]

Figure S1.

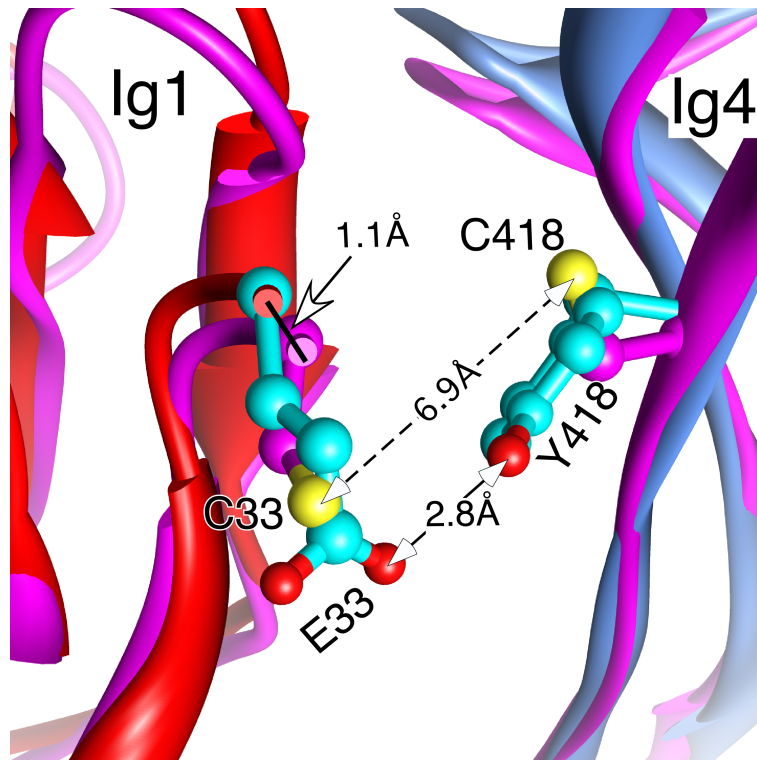

**Fig. S1. Comparison of the homology models of WT-L1 and E33C/Y418C reduced.** The wild type model is colored as in Fig. 6 A. and the E33C/Y418C reduced model as in Fig. 6B. The Ig4 domains of each model were superimposed.
